# Supplementary material
Source: PubMed Central journal article supplement (PMC4931893)

## Role of Chromatin Structural Changes in Regulating Human CYP3A Ontogeny

Nicholas L. Giebel, Jeffrey D. Shadley, D. Gail McCarver, Kenneth Dorko, Stephen C. Strom, Ke Yan, Pippa M. Simpson and Ronald N. Hines  
*Drug Metabolism and Disposition*

**Supplemental Table 1:** qPCR Primers for Quantifying ChIP Products

| Element                    | Amplicon          | Forward Primer           | Reverse Primer              | Size (bps)          |
|----------------------------|-------------------|--------------------------|-----------------------------|---------------------|
| <b>CYP3A4</b>              |                   |                          |                             |                     |
| CLEM4 <sup>1</sup>         | 8                 | GCATGTAAGTAGCTGTCTTTCAGG | CCATCTTACTGGCATAATCCTTGTTG  | 243                 |
|                            | 7                 | CCTAATAATGTGTTTTGGGGTAA  | CAAAGCTTCCAAGGTTGCAGAC      | 272                 |
|                            | 5                 | CTCGTGGTCTGCAACCTTG      | TCTGAGCCACAGAGTGACCTA       | 306                 |
|                            | 3                 | CCAATGCTCCCTTCCGTAGGTCA  | GAGTCAGGTAAGGCTTGGTAAT      | 251                 |
| XREM <sup>2</sup>          | 1                 | AGGTCCCCTGGAAAGTCACTG    | TTACAAACTGGGCTTTATGAC       | 182                 |
|                            | 2                 | TGGTTGCTGGTTTATTCTAGAG   | ATTTCAAGGGCACCGAGAG         | 168                 |
|                            | 3                 | AGAAACTCATGTCCCAATTAAG   | ATGATTTCAAGGGCACCGAG        | 118                 |
|                            | 4                 | GCCCAGTTTGTAAACTGAGATG   | ACAGGACAAGGTTTAATAATC       | 157                 |
|                            | 5                 | GTGCCCTTGAAATCATGTCG     | GAATATGATAGCTTGTCTT         | 142                 |
| C/EBP $\beta$ <sup>3</sup> | 1                 | ACCATTTGCTTAAACATCATGCAC | GCGTCTTGAAAAACATAGATCTTG    | 198                 |
|                            | 2                 | GAGGGACTGAAGACAAGGAAA    | GAAATTAGTGAAGGAAATGAAGATC   | 216                 |
|                            | 4                 | CATCTCATGATGATCTTCATTTT  | AACAGGTAAAAGAGAAATCAGAGAATG | 109                 |
|                            | 5                 | CATTCTCTGATTTCTCTTTTACC  | GCTGGTTGTGACCACGAAAACG      | 195                 |
|                            | 6                 | TAGGATGCACATGTCGTTTTTCGT | TGCTGTGATTACAAATTGTGCCGGTA  | 189                 |
|                            | Proximal Promoter | 1                        | GATTGAGTTGTTTATGATAC        | CTCTTTGCTGGGCTATGTG |
| 2                          |                   | GCCCTGCCTCCTTCTCTAGC     | TCTGGGATGAGAGCCATCAC        | 170                 |
| 3                          |                   | CACAGAGCTGAAAGGAAGAC     | ACGCCCGGCCTGAACATC          | 235                 |
| 4                          |                   | GGTGCTCCTCTATCTGT        | GGCAGTCCACTTGCCTTA          | 182                 |

| Element                    | Amplicon | Forward Primer                    | Reverse Primer                | Size (bps) |
|----------------------------|----------|-----------------------------------|-------------------------------|------------|
| <b>CYP3A7</b>              |          |                                   |                               |            |
| XREM <sup>2</sup>          | A        | CCTGGAAAGTCACAGGATTTGG            | TTATCTCAGTTTACAACTGGAGTTTATG  | 177        |
|                            | C        | CAATGAAACTCATGTCCCAACTAAAG        | TGATTTCAAGGGCACTGAGAGG        | 120        |
|                            | E        | CAGTGCCCTTGAAATCATGTCAG           | CTTGTCAGAAGTCCAGCTTGTG        | 127        |
| C/EBP $\beta$ <sup>3</sup> | F        | CACCGTGTACAGTTGGAGAAGTG           | GCTTCAGTCCCTGCAACTGTTC        | 140        |
|                            | G        | CAGGGACTGAAGCCAAGGAAG             | CAGGAAATTGGTGAAGGAAATGAAGATTG | 215        |
|                            | I        | CTTCACCAATTTCTGTTTTCATTAAATTC     | GAGCTCATGTTTCAGCAGAAAG        | 192        |
|                            | J        | GCCTCATATTCTTTGATTTCTCTTTTAC      | AAATGCTACAGAGCTGGTTATGAC      | 212        |
| Proximal Promoter          | N        | GCTCTGTCTGGCTGGGTATGAAAG          | CCAAGGGTTCTGGGTCTTATCAC       | 210        |
|                            | L        | GGACAGCCATAGAGACAAGAGGAGAGTTAATAG | CGTGCTCTGCCTGCAGTCGGAAG       | 224        |
|                            | M        | CTTCCGACTGCAGGCAGAG               | CCAAGTTTGGGATGAGATCCATCACTAC  | 225        |

<sup>1</sup> Constitutive Liver Enhancer Module

<sup>2</sup> Xenobiotic Response Enhancer Module

<sup>3</sup> CCAAT-enhancer binding beta domain

**Figure 1S:** CYP3A4 activity in postnatal primary hepatocyte preparations. CYP3A4 activity was measured for 9/10 of the postnatal samples using a commercial cell-based assay (P450-Glo™ CYP3A4 Assay, Luciferin-IPA; Promega Corporation, Madison, WI, USA) with some modifications, as previously described (Gramignoli *et al.*, 2014). Results are expressed as Luminescent Counting Unit (LCU)/min and are normalized to a million viable cells. The horizontal bar depicts the mean activity determined in 75 different primary human hepatocyte preparations while the shaded area depicts one standard deviation from the mean (Gramignoli *et al.*, 2014). Pediatric (<18 yrs of age) (○) and adult (>18 yrs of age) (●) activities are shown and are labeled with the sample ID numbers (Table 2).

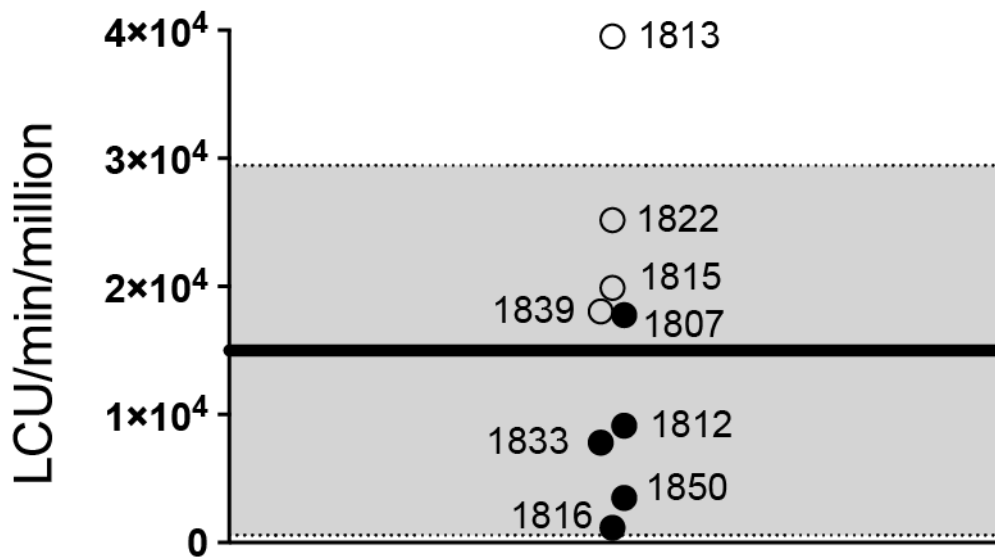

Supplement: supp_116.069344_Supplemental_69344.pdf [file supp_116.069344_Supplemental_69344.pdf]
